# Supplementary material
Source: MDPI journal article supplement (https://www.mdpi.com/2073-4344/11/11/1381)
Supplement: s1 [file s1 › catalysts-1450711-supplementary.pdf]

**Supporting Information for**

**Examination of the Catalytic Role of the Axial Cys ligand in the Co-type Nitrile Hydratase from *Pseudonocardia thermophila* JCM 3095<sup>†</sup>**

Irene R.A.M. Ogutu,<sup>1,2</sup> Martin St. Maurice,<sup>3</sup> Bennett Brian,<sup>4\*</sup> and Richard C. Holz,<sup>1,2\*</sup>

*Contribution from the <sup>1</sup>Department of Chemistry, Colorado School of Mines, Golden, Colorado 80401, <sup>2</sup>Department of Chemistry, Marquette University, P.O. Box 1881 Milwaukee, Wisconsin 53201-1881, <sup>3</sup>Department of Biology, Marquette University, 1428 W. Clybourn St., Milwaukee, Wisconsin 53201-1881, and <sup>4</sup>Department of Physics, 1420 W. Clybourn St., Marquette University, Milwaukee, Wisconsin 53233*

The purity of the protein samples was analyzed using SDS-PAGE and the enzyme were ~95% pure as shown in figure S1

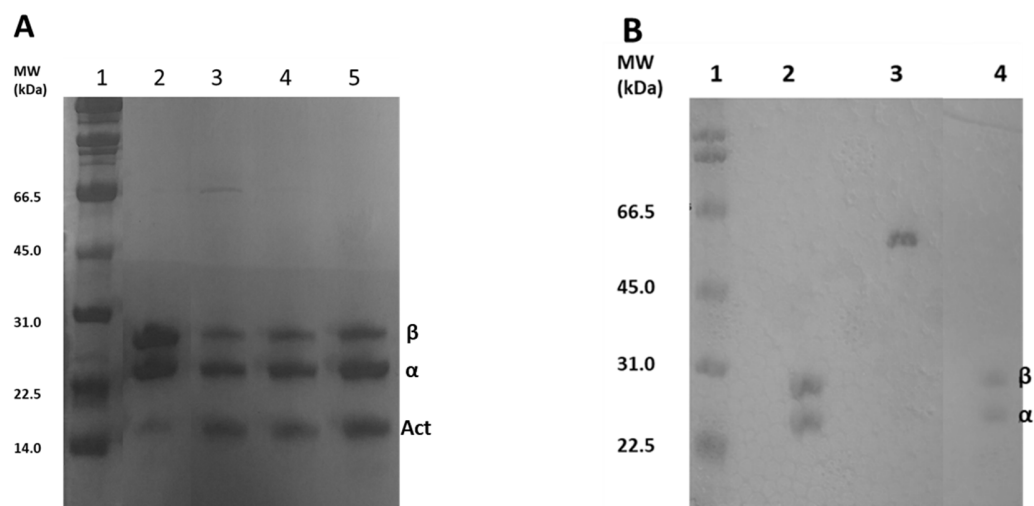

**Figure S1:** SDS-PAGE for the purified *Pt*NHase wildtype and mutants (A) 1) protein ladder, 2) wildtype, 3)  $\alpha$ Cys108His, 4)  $\alpha$ Cys108Met, and  $\alpha$ Cys108Ser (B) 1) protein ladder, 2) wildtype, 3)  $\alpha$ Ser162A<sup>B</sup>, and 4)  $\alpha$ Ser162A<sup>A</sup>

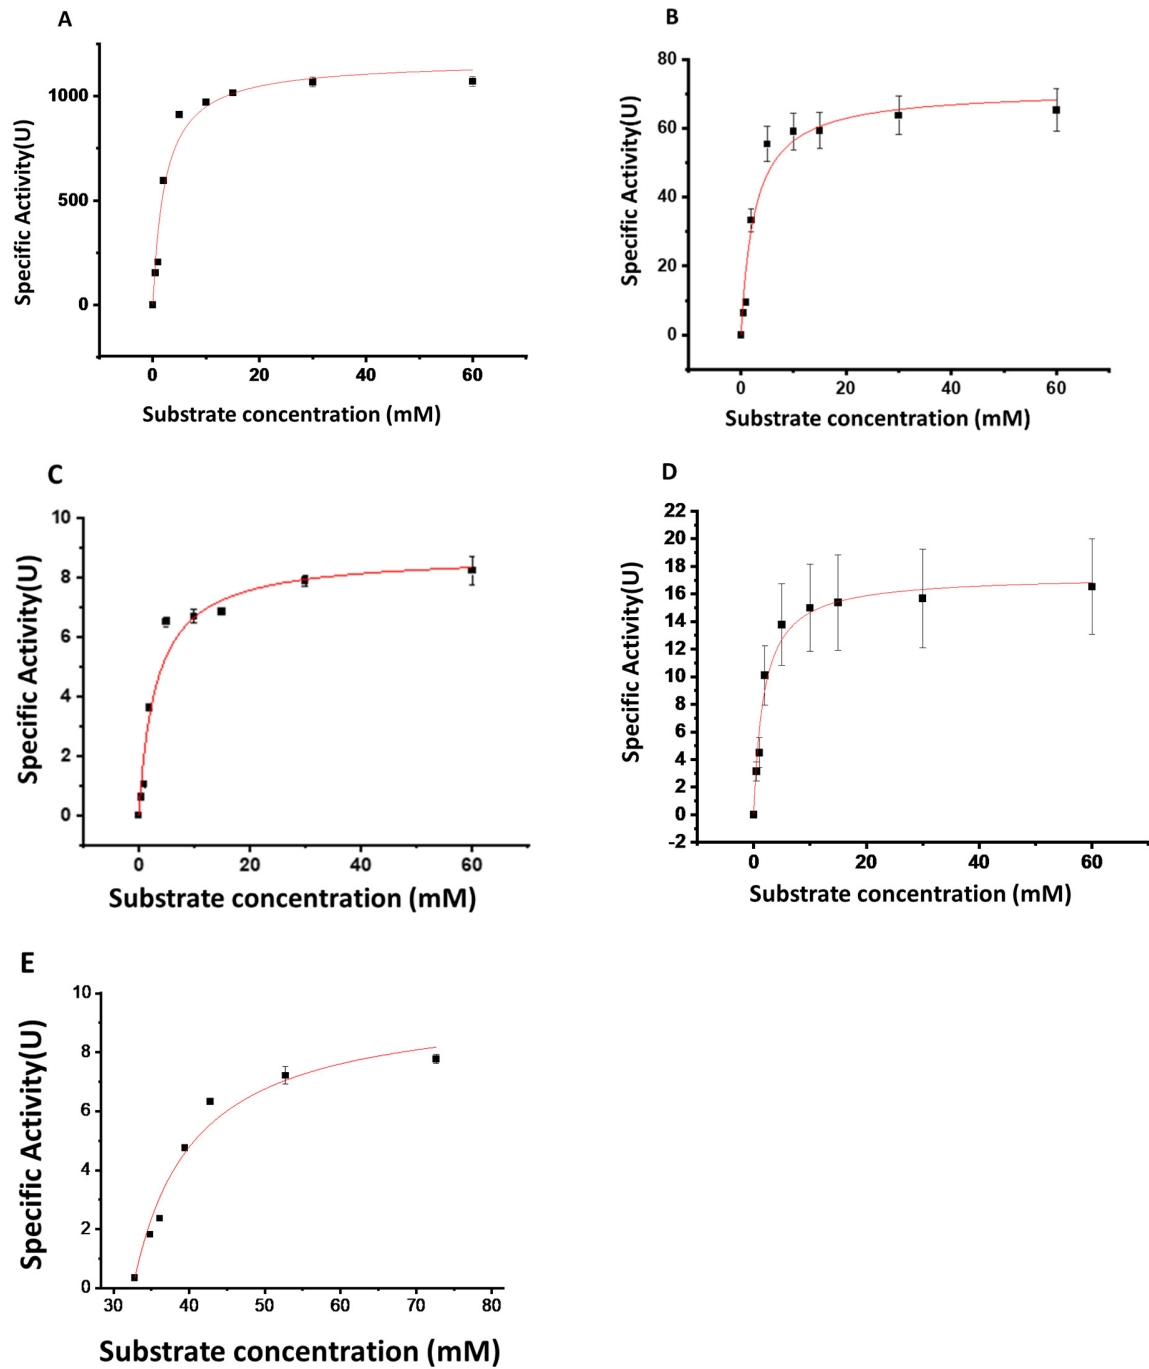

Figure S2: Michaelis-Menten graphs for *Pt*NHase protein samples (A) wildtype, (B)  $\alpha$ Cys108His, (C)  $\alpha$ Cys108Met, (D)  $\alpha$ Cys108Ser and (E)  $\alpha$ Ser162A<sup>B</sup>. The kinetic constants  $V_{\max}$  and  $K_m$  were calculated by fitting these data to the Michaelis-Menten equation using OriginPro 9.0 (OriginLab, Northampton, MA).
